# Supplementary material for: Synchrotron scanning reveals the palaeoneurology of the head-butting Moschops capensis (Therapsida, Dinocephalia)
Source: PeerJ journal article supplement (doi:10.7717/peerj.3496), 2017-08-10

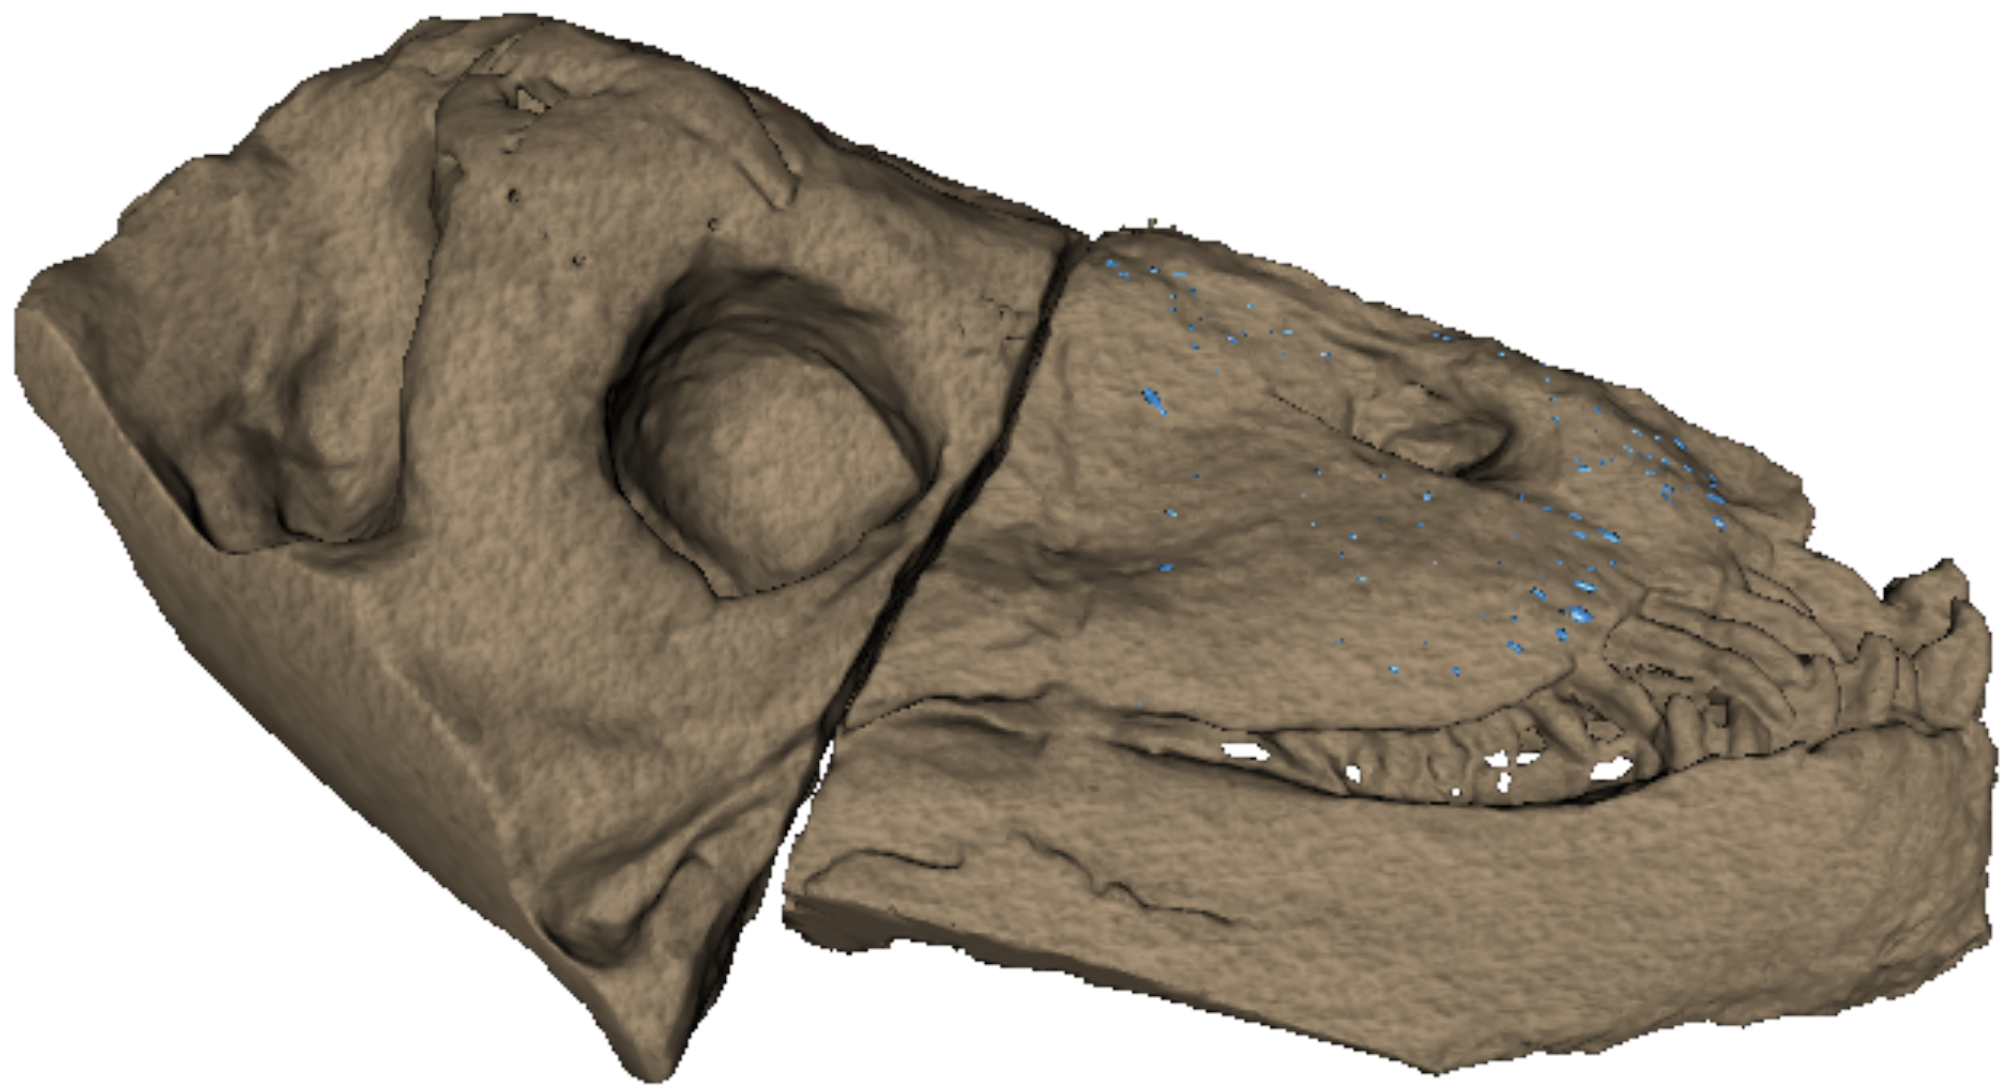

Supplement: Moschops_capensis_AM6556.pdf [file Moschops_capensis_AM6556.pdf]
